# Supplementary material for: Geographic Pattern of Sushi Product Misdescription in Italy—A Crosstalk between Citizen Science and DNA Barcoding
Source: MDPI journal article supplement (doi:10.3390/foods10040756), 2021-04-02
Supplement: s1 [file s1]

## SUSHI SAMPLING GUIDE

DATE \_\_/\_\_/\_\_

Sampler's name: \_\_\_\_\_ City: \_\_\_\_\_

The kit includes:

- Presentation letter.
- Steril Eppendorf numbered from 1 to 4, containing 96% ethanol.
- Sterile disposable scalpels and tweezers and Parafilm;
- Sampling datasheet (see below) to be filled in and sent together with samples
- Stamped envelope for the shipment of samples and datasheet

Recommendation before starting the sampling

- Wash the hands;
- Clean the work surface or use aluminum foil.
- Avoid the contamination of the sample.
- If possible, take pictures of menù, dishes, and ingredients.
- The sample must be taken from a part not in contact with rice, seaweed, or other seafood types.

---

### SECTION TO BE FILLED IN

Indicate the sushi venue (put an X on the square):

- ☐ Ristorante
- ☐ Take away

Write below every numbered tube the sample type (WHITE FISH, TUNA, EGGS) and report the species indicated in the menù (see the example).

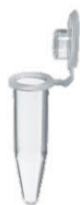

1

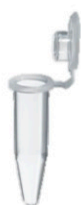

2

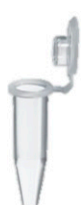

3

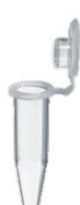

4

Example:

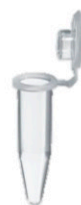

1

White fish -Seabass

Finally, envelope each tube with a Parafilm piece (included in the kit) to seal the caps and prevent their opening during transport. Put the tubes and this filled datasheet in the stamped envelope and sent it.
